# Supplementary material
Source: ML conference proceedings conference paper supplement (https://openreview.net/forum?id=Cs74qIBfiq)
Supplement: supplementary_material [file attachment]

---

# Zero-Shot Robustification of Zero-Shot Models With Auxiliary Foundation Models

---

Anonymous Author(s)

Affiliation

Address

email

## Abstract

1 Zero-shot inference is a powerful paradigm that enables the use of large pretrained  
2 models for downstream classification tasks without further training. However,  
3 these models are vulnerable to inherited biases that can impact their performance.  
4 The traditional solution is fine-tuning, but this undermines the key advantage of  
5 pretrained models, which is their ability to be used out-of-the-box. We propose  
6 ROBOSHOT, a method that improves the robustness of pretrained model embed-  
7 dings in a fully zero-shot fashion. First, we use zero-shot language models (LMs)  
8 to obtain useful insights from task descriptions. These insights are embedded and  
9 used to remove harmful and boost useful components in embeddings—without any  
10 supervision. Theoretically, we provide a simple and tractable model for biases in  
11 zero-shot embeddings and give a result characterizing under what conditions our  
12 approach can boost performance. Empirically, we evaluate ROBOSHOT on nine  
13 image and NLP classification tasks and show an average improvement of 15.98%  
14 over several zero-shot baselines. Additionally, we demonstrate that ROBOSHOT is  
15 compatible with a variety of pretrained and language models.

## 16 1 Introduction

17 Zero-shot models are among the most exciting paradigms in machine learning. These models obviate  
18 the need for data collection and model training loops by simply asking the model for a prediction  
19 on any set of classes. Unfortunately, such models inherit biases or undesirable correlations from  
20 their large-scale training data [DLS<sup>+</sup>18, TE11]. In a now-canonical example [KSM<sup>+</sup>21], they often  
21 associate *waterbirds* with *water* background. This behavior leads to decreased performance,  
22 often exacerbated on rare data slices that break in-distribution correlations.

23 A growing body of literature [YNPM23, GKG<sup>+</sup>22, ZR22] seeks to improve robustness in zero-shot  
24 models. While promising, these works require labeled data to train or fine-tune models, and so **do**  
25 **not tackle the zero-shot setting**. A parallel line of research seeking to debias word embeddings  
26 [AZS<sup>+</sup>, BCZ<sup>+</sup>16, DP19, LGPV20] often sidesteps the need for labeled data. Unfortunately, these  
27 works often require domain expertise and painstaking manual specification in order to identify  
28 particular concepts that embeddings must be invariant to. As a result, out-of-the-box word embedding  
29 debiasing methods also cannot be applied to zero-shot robustification.

30 Can we robustify zero-shot models without (i) labeled data, (ii) training or fine-tuning, or (iii) manual  
31 identification? Surprisingly, despite this seemingly impoverished setting, it is often possible to do  
32 so. Our key observation is that zero-shot models **contain actionable insights** that can be exploited  
33 to improve themselves or other zero-shot models. These insights are noisy but cheaply available at  
34 scale—and can be easily translated into means of refinement for zero-shot representations. These  
35 refinements improve performance, particularly on underperforming slices—at nearly no cost.

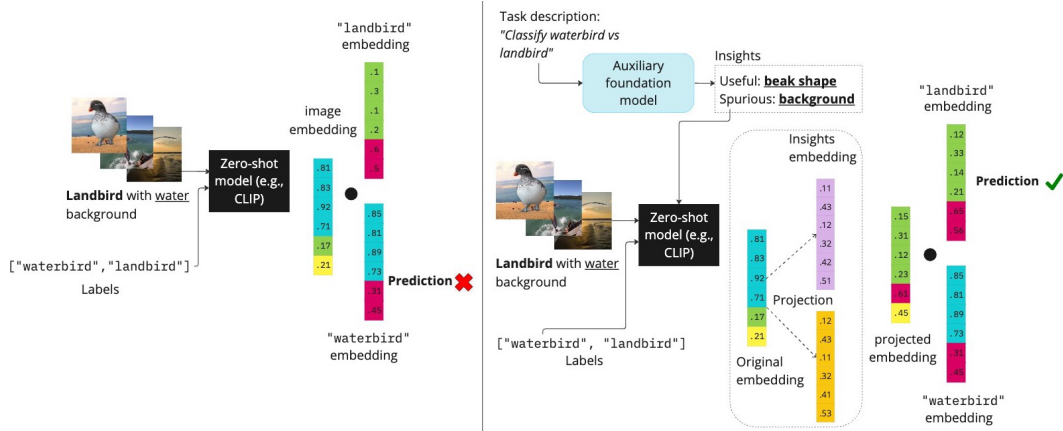

Figure 1: ROBOSHOT pipeline (right) vs. vanilla zero-shot classification (left).

We propose ROBOSHOT, a system that robustifies zero-shot models via auxiliary language models *without labels, training, or manual specification*. Using just the task description, ROBOSHOT obtains *positive and negative insights* from a language model (potentially the model to be robustified itself). It uses embeddings of these noisy insights to recover *harmful, beneficial, and benign* subspaces of zero-shot latent representation spaces. Representations are then modified to neutralize and emphasize their harmful and beneficial components, respectively.

Theoretically, we introduce a simple and tractable model to capture and quantify failures in zero-shot models. We provide a result that characterizes the *quantity and quality* of insights that must be obtained as a function of the severity of harmful correlations. Empirically, ROBOSHOT achieves 15.98% improvement across nine image and NLP datasets while offering sufficient versatility to apply to a diverse variety of base models. Most excitingly, in certain cases, it reaches comparable or greater improvements **even when compared to fine-tuned models** that rely on labeled data.

Our contributions include,

1. A simple theoretical model describing zero-shot model failures along with a theoretical analysis of our approach that characterizes the amount of information required for obtaining improvements as a function of the most harmful unwanted correlation,
2. ROBOSHOT, an algorithm that implements our core idea. It extracts insights from foundation models and uses them to improve zero-shot representations,
3. Extensive experimental evidence on zero-shot language and multimodal models, showing improved worst-group accuracy of 15.98% across nine image and NLP datasets.

## 2 Related Work

We describe related work in zero-shot model robustness, debiasing embeddings, guiding multi-modal models using language, and using LMs as prior information.

**Zero-Shot inference robustness.** Improving model robustness to unwanted correlations is heavily studied [SKHL19, ABGLP19, KCJ<sup>+</sup>21, KIW22, LHC<sup>+</sup>21, LCT<sup>+</sup>22]. Some methods require training from scratch and are less practical when applied to large pretrained architectures. Existing approaches to improve robustness *post-pretraining* predominantly focus on fine-tuning. [YNPM23] detects spurious attribute descriptions and fine-tunes using these descriptions. Specialized contrastive loss is used to fine-tune a pretrained architecture in [GKG<sup>+</sup>22] and to train an adapter on the frozen embeddings in [ZR22]. While promising, fine-tuning recreates traditional machine learning pipelines (e.g., labeling, training, etc.), which contradicts the promise of zero-shot models. In contrast, our goal is to avoid any training and any use of labeled data.

**Debiasing embeddings.** A parallel line of work seeks to de-bias text embeddings [AZS<sup>+</sup>] [BCZ<sup>+</sup>16] [DP19] [LGPV20] and multimodal embeddings [WZS22, BHB<sup>+</sup>22, WLW21] by re-

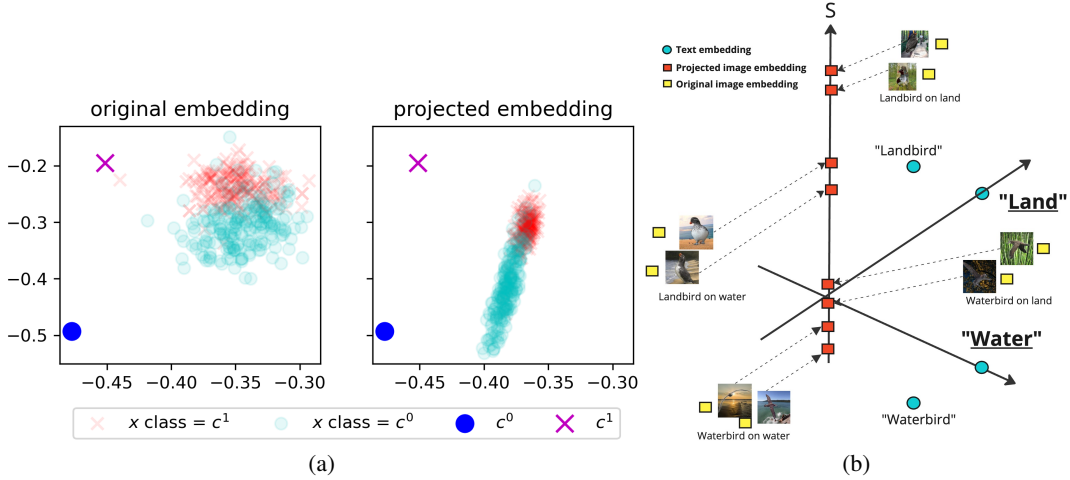

Figure 2: (a) ROBOSHOT debiases original input embedding (left). The projected embedding (right)’s variance in the unwanted direction is reduced, and in the relevant direction increases. (b) Embedding projection. We project embeddings to the space orthogonal to the embeddings of all unwanted insights (e.g., water and land)

70 moving subspaces that contain harmful or unwanted concepts. We use a similar procedure as a  
 71 building block. However, these methods either target specific fixed concepts (such as gender) or rely  
 72 on concept annotations, which limits their applicability across a wide range of tasks. In contrast, our  
 73 method automates getting *both beneficial and unwanted concepts* solely from the task descriptions.  
 74 An additional difference is that our goal is simply to add robustness at low or zero-cost; we not seek  
 75 to produce fully-invariant representations as is often desired for word embeddings.

76 **Using language to improve visual tasks** A large body of work has shown the efficacy of using  
 77 language to improve performance on vision tasks [RKH<sup>+</sup>21, FCS<sup>+</sup>13, LCLBC20]. Most relevant  
 78 are those that focus on robustness, like [PDN<sup>+</sup>22], where attention maps using multimodal models  
 79 (like CLIP) are used as extra supervision to train a downstream image classifier. [YNPM23] uses  
 80 text descriptions of spurious attributes in a fine-tuning loss to improve robustness against spurious  
 81 correlations. In contrast to these works, we focus on using textual concepts to improve zero-shot  
 82 model robustness—without fine-tuning.

83 **Language model as prior** The basis of our work comes from the observation that language models  
 84 contain information that can serve as a prior for other learning tasks. [KNST23] finds that LLMs can  
 85 perform causal reasoning tasks, substantially outperforming existing methods. [CCSE22] explicitly  
 86 prompts LLMs for task-specific priors, leading to substantial performance improvements in feature  
 87 selection, reinforcement learning, and causal discovery. Our work shares the spirit of these approaches  
 88 in using the insights embedded in language models to enhance zero-shot robustness.

### 89 3 RoboShot: Robustifying Zero-shot Models

90 We are ready to provide our setup and describe the algorithm.

#### 91 3.1 Modeling and setup

92 Suppose that the zero-shot model’s latent space contains an (unknown) *concept set*; similar notions  
 93 have been studied frequently in the literature [DKA<sup>+</sup>]. For simplicity, we assume that this concept  
 94 set is given by the orthonormal vectors  $\{z_1, \dots, z_k\}$ . The model’s encoder produces, for a particular  
 95 input a representation  $x$  that is a mixture of concepts  $\sum_i \gamma_i z_i$ , where  $\gamma_i \geq 0$  are weights.

96 We shall work with the following theoretical model for zero-shot classification. It closely resembles  
 97 models like CLIP. For simplicity, we assume that there are two classes. It is straightforward to extend

---

**Algorithm 1: ROBOSHOT**

---

1: **Parameters:** Input embedding  $x$ , class embeddings  $c^0, c^1$ , harmful insight representations  $v^1, \dots, v^{|S|}$ , helpful insight representations  $u^1, \dots, u^{|R|}$   
2: **for**  $j \in \{1, 2, \dots, |S|\}$  **do**  
3:   Reject harmful insight  $v_j$ : set  $x \leftarrow x - \langle x, v^j \rangle / \langle v^j, v^j \rangle v^j$   
4:   Renormalize  $x = x / \|x\|$   
5: **end for**  
6: **for**  $k \in \{1, 2, \dots, |R|\}$  **do**  
7:   Increase helpful insight  $u_k$ : set  $x \leftarrow x + \langle x, u^k \rangle / \langle u^k, u^k \rangle u^k$   
8: **end for**  
9:  $\hat{c} = \mathbb{1}\{x^T c^0 < x^T c^1\}$   
10: **Returns:** Robustified zero-shot prediction  $\hat{c}$

---

the analysis below to multiple classes. We take  $\sum_i \alpha_i z_i$  to be the embedding of a datapoint, while  $c^0 = \sum_i \beta_{i,0} z_i$  is the embedding of the first class and  $c^1 = \sum_i \beta_{i,1} z_i$  is that of the second. Finally, we assume that we have access to  $m$  answers  $v^1, \dots, v^m$  from the queries to the language model. These are given by  $v^j = \sum_i \gamma_{i,j} z_i$  for  $j \leq m$ . We call these *insight representations*. Without our approach, the prediction is made by  $\mathbb{1}\{(\sum_i \alpha_i z_i)^T (\sum_i \beta_{i,0} z_i) < (\sum_i \alpha_i z_i)^T (\sum_i \beta_{i,1} z_i)\}$ , so that we predict whichever class has higher inner product with the datapoint’s embedding.

Next, we assume that each input representation  $x$  can be represented by partitioning the mixture components into three groups,

$$x = \sum_s^S \alpha_s^{\text{harmful}} z_s + \sum_r^R \alpha_r^{\text{helpful}} z_r + \sum_b^B \alpha_b^{\text{benign}} z_b.$$

The same holds for class and insight representations.

**Example** We illustrate how harmful correlations produce errors on rare slices of data through a standard task setting, Waterbirds [KSM<sup>+</sup>21]. In this dataset, the goal is to classify landbirds versus waterbirds, and the background (land or water) is spurious. Suppose that we have these terms relate to concepts such that  $z_{\text{water}} = -z_{\text{land}}$  and  $z_{\text{waterbird}} = -z_{\text{landbird}}$ .

Consider a datapoint coming from a rare slice infrequently encountered in the training set. This might be an image of a landbird over water. Its embedding might be  $x = 0.7z_{\text{water}} + 0.3z_{\text{landbird}}$ . We may also have that

$$c_{\text{waterbird}} = 0.4z_{\text{water}} + 0.6z_{\text{waterbird}} \text{ and } c_{\text{landbird}} = 0.4z_{\text{land}} + 0.6z_{\text{landbird}}.$$

Then,  $x^T c_{\text{waterbird}} = 0.1 > x^T c_{\text{landbird}} = -0.1$ , so that the prediction is waterbird, and thus incorrect. This is caused by the presence of harmful components in *both* the class embedding (caused by seeing too many images with water described as waterbirds) and the datapoint embedding (where the water background appears). Thus our goal is to *remove* harmful components (the  $z_s$ ’s) and *boost* helpful components (the  $z_r$ ’s). We explain our approach towards doing so next.

### 3.2 ROBOSHOT: Zeroshot robustification with LLM

We describe ROBOSHOT in Algorithm 1. It uses representations of insights from language models to shape input and class embeddings to remove harmful components and boost helpful ones. Figure 2 is helpful in understanding the intuition behind these procedures. The left part (a) illustrates the effect of ROBOSHOT on a true dataset. Note how unhelpful directions are neutralized while others are boosted. The illustration on the right (b) shows this effect on the waterbirds running example.

**Obtaining insight representations from LMs** The first question is how to obtain insight representations without training. To do so in a zero-shot way, we use *textual* descriptions of harmful and helpful concepts by querying language models using *only the task description*. For example, in the Waterbirds dataset, we use the prompt “What are the biased/spurious differences between waterbirds and landbirds?”. We list the details of the prompts used in the Appendix B.2. Let  $s_1, s_2$  be the text insights obtained from the answer (e.g., {‘water background,’ ‘land background’}). We obtain

a spurious insight representation by taking the difference of their embedding  $v = \frac{g(s_1) - g(s_2)}{\|g(s_1) - g(s_2)\|}$ , where  $g$  is the text encoder of our model.

In addition to attempting to discover harmful correlations, we seek to discover helpful components in order to boost their magnitudes past remaining harmful ones (or noise). The procedure is similar. We obtain insight representations using language models. For example, we ask ‘‘What are the true characteristics of waterbirds and landbirds?’’ and obtain e.g., {‘short beak,’ ‘long beak’}. The remainder of the procedure is identical to the case of harmful components. Note that since we are seeking to boost (rather than remove) components, it is also possible to fix a multiplicative constant (to be treated as a hyperparameter) for the boosting procedure. That is, we could take  $x \leftarrow x + \nu \times \langle x, u^k \rangle / \langle u^k, u^k \rangle u^k$  for some  $\nu > 0$ . While this is possible if we have access to a labeled set that we can tune  $\nu$  over, we *intentionally avoid doing so to ensure our procedure is truly zero-shot*.

Prompting a language model is typically inexpensive, which will enable obtaining multiple insight vectors  $\tilde{v}^1, \dots, \tilde{v}^m$ . From these, we obtain an orthogonal basis  $v^1, \dots, v^m$  separately for harmful and helpful components. Thus we have access to recovered subspaces spanned by such components.

**Removing and Boosting Components** ROBOSHOT applies simple vector rejection to mitigate or remove harmful components, which is described in lines 2-5 of Algorithm 1. Similarly, it boosts helpful components as described in lines 6-9.

To see the impact of doing so, consider our earlier example. Suppose that  $v^{\text{harmful}} = 0.9z_{\text{water}} + 0.1z_{\text{landbird}}$ , and that this is our only harmful insight. Similarly, suppose that we obtain a single helpful insight given by  $v^{\text{helpful}} = 0.1z_{\text{water}} + 0.9z_{\text{landbird}}$ . Note that even these insights can be imperfect: they do not uniquely identify what are harmful or helpful concepts, as they have non-zero weights on other components.

We first obtain from removing the harmful component (ignoring normalization for ease of calculation) that

$$\hat{x} \leftarrow x - \frac{\langle x, v^{\text{harmful}} \rangle}{\langle v^{\text{harmful}}, v^{\text{harmful}} \rangle} v^{\text{harmful}} = -0.0244z_{\text{water}} + 0.2195z_{\text{landbird}}.$$

Then, we already we have that  $x^T c_{\text{waterbird}} = -0.1415 < x^T c_{\text{landbird}} = 0.1415$ , so that the correct class is obtained. In other words we have already, from having access to a single insight, neutralized a harmful correlation and corrected what had been an error. Adding in the helpful component further helps. We obtain

$$\hat{x} \leftarrow \hat{x} + \frac{\langle \hat{x}, v^{\text{helpful}} \rangle}{\langle v^{\text{helpful}}, v^{\text{helpful}} \rangle} v^{\text{helpful}} = -0.0006z_{\text{water}} + 0.4337z_{\text{landbird}}.$$

This further increases our margin. Note that it is not necessary to fully neutralize (i.e., to be fully invariant to) spurious or harmful components in our embeddings. The only goal is to ensure, as much as possible, that their magnitudes are reduced when compared to helpful components (and to benign components). In the following section, we provide a theoretical model for the magnitudes of such components and characterize the conditions under which it will be possible to correct zero-shot errors. We note that there is a variant of our approach that can also update class embeddings as well.

## 4 Analysis

Next, we provide an analysis that characterizes under what conditions ROBOSHOT is capable of correcting zero-shot errors. First, we consider the following error model on the weights of the various representations. For all benign representations, we assume that  $\alpha_b, \beta_b, \gamma_b \sim \mathcal{N}(0, \sigma_{\text{benign}}^2)$ . That is, the magnitudes of benign components are drawn from a Gaussian distribution. The value of  $\sigma_{\text{benign}}$  is a function of the amount of data and the training procedure for the zero-shot model.

Next, we assume that the embedding insight  $v_s = \sum_{i=1}^k \gamma_{i,s} z_i$  (where  $1 \leq s \leq S$ ) satisfies the property that for  $i \neq s$ ,  $\gamma_{i,s} \sim \mathcal{N}(0, \sigma_{\text{insight}}^2)$ , while  $\gamma_{s,s}$  is a constant. In other words, the vectors  $v_1, \dots, v_S$  spanning the harmful component subspace are well-aligned with genuinely harmful concepts, but are also affected by noise. We seek to understand the interplay between this noise, benign noise, and the coefficients of the other vectors (i.e., helpful components). Let the result of rejecting embedding insights  $v_1, \dots, v_S$  be

$$\hat{x} = x - \sum_{s=1}^S \frac{x^T v_s}{\|v_s\|^2} v_s = \sum_i A_i z_i.$$

178 We provide a bound on  $A_s$ , the coefficient of a targeted harmful concept post-removal.

179 **Theorem 4.1.** *Under the noise model described above, the post-removal coefficient for harmful*  
 180 *concept  $s$  satisfies*

$$|\mathbb{E}[A_s]| \leq \left| \frac{(k-1)\alpha_s\sigma_{insight}^2}{\gamma_{s,s}^2} \right| + \left| \sum_{t \neq s}^S \frac{\alpha_s\sigma_{insight}^2}{\gamma_{t,t}^2} \right|,$$

181 where  $k$  is the number of concepts.

182 The theorem illustrates how and when the rejection component of ROBOSHOT works—it scales  
 183 down harmful coefficients at a rate inversely proportional to the harmful coefficients of the insight  
 184 embeddings. As we would hope, when insight embeddings have larger coefficients for harmful vectors  
 185 (i.e., are more precise in specifying terms that are not useful), ROBOSHOT yields better outcomes.  
 186 In addition, we observe that the harmful coefficients decrease when the insight embeddings have  
 187 less noise. In fact, we have that  $\lim_{\sigma_{insight} \rightarrow 0} A_s = 0$  — the case of perfectly identifying harmful  
 188 concepts. In the Appendix, we present additional theoretical results for control of helpful coefficients  
 189 along with a combined result.

## 190 5 Experimental Results

191 This section evaluates the following claims about ROBOSHOT:

- 192 • **Improving multi-modal models (Section 5.1):** ROBOSHOT improves zero-shot classification  
 193 robustness of various multi-modal models, even outperforming prompting techniques that include  
 194 spurious insight descriptions (which we do not have access to) in the label prompts.
- 195 • **Improving language models (Section 5.2):** ROBOSHOT improves zero-shot robustness when  
 196 using language model embeddings for text zero-shot classification.
- 197 • **Extracting concepts from LM with varying capacities (Section 5.3):** ROBOSHOT can extract  
 198 insights from language models with varying capacities. Improvements persist with weaker LMs.
- 199 • **Ablations (Section 5.4)** ROBOSHOT benefits from both removing harmful and boosting helpful  
 200 representations (line 3 and line 7 in ROBOSHOT Algorithm 1).

201 **Metrics and how to interpret the results.** We use three metrics: average accuracy % (AVG),  
 202 worst-group accuracy % (WG), and the gap between the two (Gap). While a model that relies on  
 203 harmful correlations may achieve high AVG when such correlations are present in the majority of the  
 204 test data, it may fail in settings where the correlation is absent. **A robust model should have high**  
 205 **AVG and WG, with a small gap between them.**

206 **Baselines** We compare against the following sets of baselines:

- 207 1. **Multimodal baselines:** We compare against: (i) vanilla zero-shot classification (**ZS**) and (ii)  
 208 zero-shot classification with group information (**Group Prompt ZS**). We do so across a variety of  
 209 models: CLIP (ViT-B-32 and ViT-L-14) [RKH<sup>+</sup>21], ALIGN [JYX<sup>+</sup>21], and AltCLIP [CLZ<sup>+</sup>22].  
 210 Group Prompt ZS assumes access to spurious or harmful insight annotations and includes them  
 211 in the label prompt. For instance, the label prompts for waterbirds dataset become [waterbird  
 212 with water background, waterbird with land background, landbird with water  
 213 background, landbird with land background]. We only report Group Prompt ZS results  
 214 on datasets where spurious insight annotations are available.
- 215 2. **Language model baselines:** We compare against zero-shot classification using multiple language  
 216 model embeddings, including BERT [RG19] and Ada [NXP<sup>+</sup>22] (**ZS**).

### 217 5.1 Improving multi-modal models

218  
 219 **Setup.** We experimented on five binary and multi-class datasets with spurious correlations and  
 220 distribution shifts, coming from a variety of domains: **Waterbirds** [SKHL19], **CelebA** [LLWT15],  
 221 **CXR14** [WPL<sup>+</sup>17], **PACS** [LYSH17], and **VLCS** [FXR13]. We use the default test splits of all  
 222 datasets. Dataset details are provided in Appendix B.1. For CXR14, we use BiomedCLIP [ZXU<sup>+</sup>23],

Table 1: Main results. Best WG and Gap performance **bolded**, second best underlined.

| Dataset    | Model           | ZS   |                  |                     | GroupPrompt ZS |                  |                     | ROBOSHOT |                  |                     |
|------------|-----------------|------|------------------|---------------------|----------------|------------------|---------------------|----------|------------------|---------------------|
|            |                 | AVG  | WG( $\uparrow$ ) | Gap( $\downarrow$ ) | AVG            | WG( $\uparrow$ ) | Gap( $\downarrow$ ) | AVG      | WG( $\uparrow$ ) | Gap( $\downarrow$ ) |
| Waterbirds | CLIP (ViT-B-32) | 80.7 | 27.9             | 52.8                | 81.6           | <u>43.5</u>      | <u>38.1</u>         | 82.0     | <b>54.4</b>      | <b>28.6</b>         |
|            | CLIP (ViT-L-14) | 88.7 | <u>27.3</u>      | 61.4                | 70.7           | 10.4             | <u>60.3</u>         | 79.9     | <b>45.2</b>      | <b>34.7</b>         |
|            | ALIGN           | 72.0 | <b>50.3</b>      | <u>21.7</u>         | 72.5           | 5.8              | 66.7                | 50.9     | 41.0             | <b>9.9</b>          |
|            | AltCLIP         | 90.1 | <u>35.8</u>      | 54.3                | 82.4           | 29.4             | <u>53.0</u>         | 78.5     | <b>54.8</b>      | <b>23.7</b>         |
| CelebA     | CLIP (ViT-B-32) | 80.1 | 72.7             | 7.4                 | 80.4           | <u>74.9</u>      | <u>5.5</u>          | 84.8     | <b>80.5</b>      | <b>4.3</b>          |
|            | CLIP (ViT-L-14) | 80.6 | <u>74.3</u>      | <u>6.3</u>          | 77.9           | 68.9             | 9.0                 | 85.5     | <b>82.6</b>      | <b>2.9</b>          |
|            | ALIGN           | 81.8 | <u>77.2</u>      | <u>4.6</u>          | 78.3           | 67.4             | 10.9                | 86.3     | <b>83.4</b>      | <b>2.9</b>          |
|            | AltCLIP         | 82.3 | <b>79.7</b>      | <b>2.6</b>          | 82.3           | <u>79.0</u>      | 3.3                 | 86.0     | 77.2             | 8.8                 |
| PACS       | CLIP (ViT-B-32) | 96.7 | 82.1             | <u>14.6</u>         | 97.9           | <u>82.7</u>      | 15.2                | 97.0     | <b>86.3</b>      | <b>10.7</b>         |
|            | CLIP (ViT-L-14) | 98.1 | 79.8             | 18.3                | 98.2           | <b>86.6</b>      | <b>11.6</b>         | 98.1     | <u>83.9</u>      | <u>14.2</u>         |
|            | ALIGN           | 95.8 | <b>77.1</b>      | <b>18.7</b>         | 96.5           | 65.0             | 31.5                | 95.0     | <u>73.8</u>      | <u>21.2</u>         |
|            | AltCLIP         | 98.5 | 82.6             | 15.9                | 98.6           | <u>85.4</u>      | <u>13.2</u>         | 98.7     | <b>89.5</b>      | <b>9.2</b>          |
| VLCS       | CLIP (ViT-B-32) | 75.6 | 20.5             | 55.1                | -              | -                | -                   | 76.5     | <b>33.0</b>      | <b>43.5</b>         |
|            | CLIP (ViT-L-14) | 72.6 | 4.20             | 68.4                | -              | -                | -                   | 71.1     | <b>12.6</b>      | <b>58.5</b>         |
|            | ALIGN           | 78.8 | 33.0             | 45.8                | -              | -                | -                   | 77.6     | <b>39.8</b>      | <b>37.8</b>         |
|            | AltCLIP         | 78.3 | 24.7             | <b>53.6</b>         | -              | -                | -                   | 78.9     | <b>25.0</b>      | 53.9                |
| CXR14      | BiomedCLIP      | 55.3 | 28.9             | 26.4                | -              | -                | -                   | 56.2     | <b>41.6</b>      | <b>14.6</b>         |

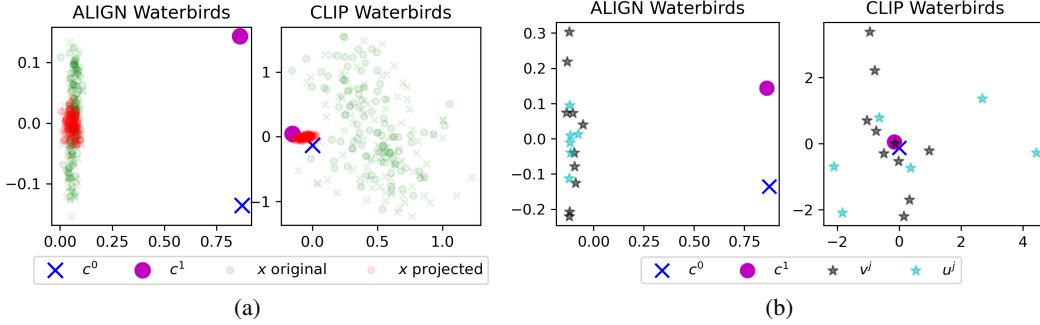

Figure 3: (a) Original (green) and projected (red) input embeddings  $x$ , and label embeddings  $c^0$  and  $c^1$ . (b) label embeddings  $c^0$  and  $c^1$ , harmful insight embeddings  $v^k$  (black star) and helpful insight embeddings  $u^j$  (blue star)

223 which is a variant of CLIP finetuned on biomedical images and articles. All experiments are conducted  
 224 using frozen pretrained models.

225 **Results.** Table 1 shows that **ROBOSHOT significantly improves the worst group performance**  
 226 **(WG)** and maintains (and sometimes also improves) the overall average (AVG) without any auxiliary  
 227 information (in contrast to Group Prompt, which requires access to spurious insight annotation).

228 Improved robustness nearly across-the-board suggests that both the insights extracted from LMs and  
 229 the representation modifications are useful. We also provide insights into the case where  
 230 our method does not improve the baseline (ALIGN model on Waterbirds) in Fig. 3. In Fig. 3a, we  
 231 visualize the original and projected input embeddings ( $x$  in green and red points, respectively), and  
 232 the label embeddings ( $c^0$  and  $c^1$ ). Fig. 3a (left) shows the embeddings from the ALIGN model. We  
 233 observe that the projected embeddings (red) still lie within the original embedding space, even with  
 234 reduced variance. In contrast, when examining the CLIP model embeddings (Figure 3a (right)), we  
 235 observe that the projected embeddings are significantly distant from the original ones. Unsurprisingly,  
 236 Figure 3b (left) reveals that  $v^j$  and  $u^k$  (harmful and helpful insight embeddings in black and blue  
 237 stars, respectively) are not distinguishable in the text embedding space of ALIGN, collapsing the  
 238 input embeddings after ROBOSHOT is applied.

Table 2: ROBOSHOT text zero-shot classification. Best WG in **bold**.

| Dataset       | Model | ZS   |                  |                     | ROBOSHOT |                  |                     |
|---------------|-------|------|------------------|---------------------|----------|------------------|---------------------|
|               |       | AVG  | WG( $\uparrow$ ) | Gap( $\downarrow$ ) | AVG      | WG( $\uparrow$ ) | Gap( $\downarrow$ ) |
| CivilComments | BERT  | 48.1 | 33.3             | 14.8                | 49.7     | <b>42.3</b>      | <b>7.4</b>          |
|               | Ada   | 56.2 | 43.2             | 13.0                | 56.6     | <b>44.9</b>      | <b>11.7</b>         |
| HateXplain    | BERT  | 60.4 | 0.0              | 60.4                | 57.3     | <b>14.0</b>      | <b>43.3</b>         |
|               | Ada   | 62.8 | 14.3             | 48.5                | 63.6     | <b>21.1</b>      | <b>42.5</b>         |
| Amazon        | BERT  | 81.1 | 64.2             | 16.8                | 81.0     | <b>64.4</b>      | <b>16.6</b>         |
|               | Ada   | 81.2 | 63.4             | <b>17.8</b>         | 82.9     | <b>63.8</b>      | 19.1                |
| Gender Bias   | BERT  | 84.8 | 83.7             | 1.1                 | 85.1     | <b>84.9</b>      | <b>0.2</b>          |
|               | Ada   | 77.9 | 60.0             | 17.9                | 78.0     | <b>60.1</b>      | 17.9                |

Table 3: ROBOSHOT with LMs of varying capacity. Best WG **bolded**, second best underlined

| Dataset    | ZS   |             | Ours (ChatGPT) |             | Ours (Flan-T5) |      | Ours (GPT2) |             | Ours (LLaMA) |             |
|------------|------|-------------|----------------|-------------|----------------|------|-------------|-------------|--------------|-------------|
|            | AVG  | WG          | AVG            | WG          | AVG            | WG   | AVG         | WG          | AVG          | WG          |
| Waterbirds | 80.7 | 27.9        | 82.0           | <b>54.4</b> | 72.1           | 32.4 | 88.0        | <u>39.9</u> | 84.8         | 36.5        |
| CelebA     | 80.1 | 72.7        | 84.8           | <u>80.5</u> | 77.5           | 68.2 | 80.3        | 74.1        | 84.2         | <b>82.0</b> |
| PACS       | 96.7 | <u>82.1</u> | 97.0           | <b>86.3</b> | 96.2           | 80.3 | 97.2        | 74.0        | 94.8         | 71.9        |
| VLCS       | 75.6 | 20.5        | 76.5           | <b>33.0</b> | 69.6           | 20.5 | 75.5        | <u>26.1</u> | 72.0         | 18.2        |

## 5.2 Improving language models

**Setup.** We experimented on four text classification datasets: **CivilComments-WILDS** [BDS<sup>+</sup>19, KSM<sup>+</sup>21], **HateXplain** [MSY<sup>+</sup>21], **Amazon-WILDS** [NLM19, KSM<sup>+</sup>21] and **Gender Bias** classification dataset [DFW<sup>+</sup>20, MFB<sup>+</sup>17]. We use the default test splits of all datasets. In text experiments, the distinctions between harmful and helpful insights are less clear than for images. For this reason, we only use harmful vector rejection (line 3 in ROBOSHOT) in text experiments. CivilComments and HateXplain are toxic classification datasets with unwanted correlation between toxicity labels and mentions of demographics (e.g., male, female, mentions of religions). The datasets are annotated with demographic mentions of each text, and we directly use them to construct  $v^j$ . For Amazon and Gender Bias datasets, we query LMs with task descriptions. All experiments are conducted using frozen pretrained models.

**Results.** Table 2 shows that ROBOSHOT also improves zero-shot text classification in text datasets, as shown by our consistent boost over the baselines across all datasets.

## 5.3 Extracting concepts from LMs with varying capacities

**Setup.** We use LMs with different capacities: **ChatGPT** [OWJ<sup>+</sup>22], **Flan-T5** [CHL<sup>+</sup>22], **GPT2** [RWC<sup>+</sup>19], and **LLaMA** [TLI<sup>+</sup>23], to get harmful and helpful features insights ( $v^j$  and  $u^k$ ).

**Results.** Table 3 shows that ROBOSHOT can get insights on  $v^j$  and  $u^k$  from LMs of various capacities and improves zero-shot performance. Even though the the LM capacity correlates with the zero-shot performance, ROBOSHOT with weaker LMs still outperforms zero-shot (ZS) baseline.

## 5.4 Ablations

**Setup.** We run ROBOSHOT with only harmful component mitigation (reject  $v^j$ : ROBOSHOT line 3), only boosting helpful vectors (increase  $u^k$ : ROBOSHOT line 7), and both.

**Results.** The combination of both projections often achieves the best performance, as shown in Table 4. Figure 4 provides insights into the impact of each projection. Rejecting  $v^j$  reduces variance in one direction, while increasing  $u^k$  amplifies variance in the orthogonal direction. When both projections are applied, they create a balanced mixture. We note that when doing both projections does not



Table 4: Main results. Best WG and Gap performance **bolded**, second best underlined.

| Dataset    | Model           | ZS   |                  | Ours ( $v^j$ only)  |      |                  |                     | Ours ( $u^k$ only) |                  |                     |      | Ours (both)      |                     |
|------------|-----------------|------|------------------|---------------------|------|------------------|---------------------|--------------------|------------------|---------------------|------|------------------|---------------------|
|            |                 | AVG  | WG( $\uparrow$ ) | Gap( $\downarrow$ ) | AVG  | WG( $\uparrow$ ) | Gap( $\downarrow$ ) | AVG                | WG( $\uparrow$ ) | Gap( $\downarrow$ ) | AVG  | WG( $\uparrow$ ) | Gap( $\downarrow$ ) |
| Waterbirds | CLIP (ViT-B-32) | 80.7 | 27.9             | 52.8                | 82.0 | <u>50.4</u>      | <u>31.6</u>         | 82.6               | 30.2             | 52.4                | 83.0 | <b>54.4</b>      | <b>28.6</b>         |
|            | CLIP (ViT-L-14) | 88.7 | 27.3             | 61.4                | 82.7 | <u>35.8</u>      | <u>46.9</u>         | 88.3               | 29.8             | 58.5                | 79.9 | <b>45.2</b>      | <b>34.7</b>         |
|            | ALIGN           | 72.0 | <u>50.3</u>      | 21.7                | 56.4 | 41.6             | 14.8                | 62.8               | <b>56.4</b>      | <b>6.4</b>          | 50.9 | 41.0             | <u>9.9</u>          |
|            | AltCLIP         | 90.1 | 35.8             | 54.3                | 81.4 | <b>59.0</b>      | <b>22.4</b>         | 89.1               | 35.2             | 53.9                | 78.5 | <u>54.8</u>      | <u>23.7</u>         |
| CelebA     | CLIP (ViT-B-32) | 80.1 | 72.7             | 7.4                 | 85.2 | <b>81.5</b>      | <b>3.7</b>          | 79.6               | 71.3             | 8.3                 | 84.8 | <u>80.5</u>      | <u>4.3</u>          |
|            | CLIP (ViT-L-14) | 80.6 | 74.3             | 6.3                 | 85.9 | <b>82.8</b>      | <u>3.1</u>          | 80.0               | 73.1             | 6.9                 | 85.5 | <u>82.6</u>      | <b>2.9</b>          |
|            | ALIGN           | 81.8 | 77.2             | 4.6                 | 83.9 | 78.0             | 5.7                 | 83.9               | <u>81.4</u>      | <b>2.5</b>          | 86.3 | <b>83.4</b>      | <u>2.9</u>          |
|            | AltCLIP         | 82.3 | <b>79.7</b>      | <b>2.6</b>          | 86.1 | 75.6             | 10.5                | 81.9               | <u>79.0</u>      | <u>2.9</u>          | 86.0 | 77.2             | 8.8                 |
| PACS       | CLIP (ViT-B-32) | 96.7 | 82.1             | 14.6                | 97.0 | 83.7             | 13.3                | 96.6               | 84.2             | <u>12.4</u>         | 97.0 | <b>86.3</b>      | <b>10.7</b>         |
|            | CLIP (ViT-L-14) | 98.1 | 79.8             | 18.3                | 98.0 | 79.8             | 18.2                | 98.1               | <u>83.8</u>      | <u>14.3</u>         | 98.1 | <b>83.9</b>      | <b>14.2</b>         |
|            | ALIGN           | 95.8 | <u>77.1</u>      | <u>18.7</u>         | 95.8 | <b>78.0</b>      | <b>17.8</b>         | 95.1               | 71.1             | 24.0                | 95.0 | 73.8             | 21.2                |
|            | AltCLIP         | 98.5 | <u>82.6</u>      | 15.9                | 98.4 | 83.0             | 15.4                | 98.6               | <u>88.8</u>      | <u>9.8</u>          | 98.7 | <b>89.5</b>      | <b>9.2</b>          |
| VLCS       | CLIP (ViT-B-32) | 75.6 | 20.5             | 55.1                | 75.6 | 22.7             | 52.9                | 76.4               | <u>29.5</u>      | <u>46.9</u>         | 76.5 | <b>33.0</b>      | <b>43.5</b>         |
|            | CLIP (ViT-L-14) | 72.6 | 4.2              | 68.4                | 70.9 | 6.8              | <u>64.1</u>         | 73.4               | 8.9              | <u>64.5</u>         | 71.1 | <b>12.6</b>      | <b>58.5</b>         |
|            | ALIGN           | 78.8 | 33.0             | 45.8                | 78.2 | 30.7             | 47.5                | 78.0               | <b>43.2</b>      | <b>34.8</b>         | 77.6 | <u>39.8</u>      | <u>37.8</u>         |
|            | AltCLIP         | 78.3 | <u>24.7</u>      | <b>53.6</b>         | 77.5 | 24.4             | <u>53.1</u>         | 79.0               | 20.5             | 58.5                | 78.9 | <b>25.0</b>      | 53.9                |
| CXR14      | BiomedCLIP      | 55.3 | 28.9             | 26.4                | 55.7 | <b>41.8</b>      | <b>13.9</b>         | 54.8               | 21.8             | 33.0                | 56.2 | <u>41.6</u>      | <u>14.6</u>         |

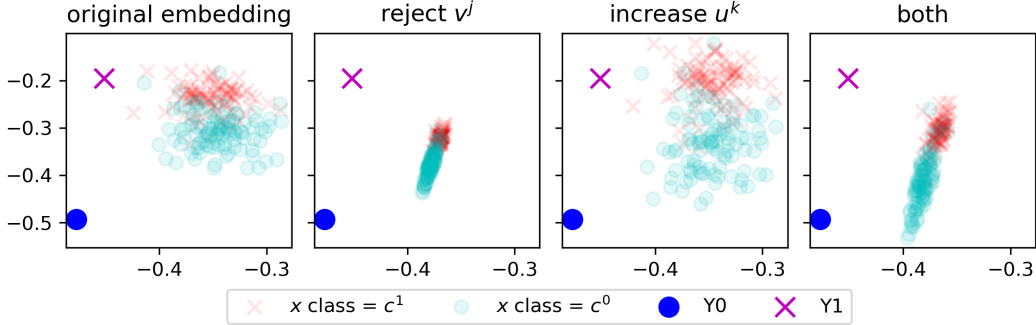

Figure 4: The effect of  $v^j$  (reject),  $u^j$  (increase), and both projections

improve the baseline, using only  $u^k$  or  $v^j$  still outperforms the baseline. For instance, the ALIGN model in the Waterbirds dataset achieves the best performance with only  $u^k$  projection. This suggests that in certain cases, harmful and helpful concepts are intertwined in the embedding space, and using just one projection can be beneficial. We leave further investigation to future work.

## 6 Conclusion

We introduced ROBOSHOT, a fine-tuning-free system that robustifies zero-shot pretrained models in a truly zero-shot way. Theoretically, we characterized the quantities required to obtain improvements over vanilla zero-shot classification. Empirically, we found that ROBOSHOT improves both multi-modal and language model zero-shot performance, has sufficient versatility to apply to various base models, and can use insights from less powerful language models.

## References

- [ABGLP19] Martin Arjovsky, Léon Bottou, Ishaan Gulrajani, and David Lopez-Paz. Invariant risk minimization. *arXiv preprint arXiv:1907.02893*, 2019.
- [AZS<sup>+</sup>] Prince Osei Aboagye, Yan Zheng, Jack Shunn, Chin-Chia Michael Yeh, Junpeng Wang, Zhongfang Zhuang, Huiyuan Chen, Liang Wang, Wei Zhang, and Jeff Phillips.

Interpretable debiasing of vectorized language representations with iterative orthogonalization. In *The Eleventh International Conference on Learning Representations*.

[BCZ<sup>+</sup>16] Tolga Bolukbasi, Kai-Wei Chang, James Y Zou, Venkatesh Saligrama, and Adam T Kalai. Man is to computer programmer as woman is to homemaker? debiasing word embeddings. In D. Lee, M. Sugiyama, U. Luxburg, I. Guyon, and R. Garnett, editors, *Advances in Neural Information Processing Systems*, volume 29. Curran Associates, Inc., 2016.

[BDS<sup>+</sup>19] Daniel Borkan, Lucas Dixon, Jeffrey Sorensen, Nithum Thain, and Lucy Vasserman. Nuanced metrics for measuring unintended bias with real data for text classification. In *Companion proceedings of the 2019 world wide web conference*, pages 491–500, 2019.

[BHB<sup>+</sup>22] Hugo Berg, Siobhan Mackenzie Hall, Yash Bhargat, Wonsuk Yang, Hannah Rose Kirk, Aleksandar Shtedritski, and Max Bain. A prompt array keeps the bias away: Debiasing vision-language models with adversarial learning. *arXiv preprint arXiv:2203.11933*, 2022.

[CCSE22] Kristy Choi, Chris Cundy, Sanjari Srivastava, and Stefano Ermon. Lmpriors: Pre-trained language models as task-specific priors. *arXiv preprint arXiv:2210.12530*, 2022.

[CHL<sup>+</sup>22] Hyung Won Chung, Le Hou, Shayne Longpre, Barret Zoph, Yi Tay, William Fedus, Eric Li, Xuezhi Wang, Mostafa Dehghani, Siddhartha Brahma, et al. Scaling instruction-finetuned language models. *arXiv preprint arXiv:2210.11416*, 2022.

[CLZ<sup>+</sup>22] Zhongzhi Chen, Guang Liu, Bo-Wen Zhang, Fulong Ye, Qinghong Yang, and Ledell Wu. Altclip: Altering the language encoder in clip for extended language capabilities. *arXiv preprint arXiv:2211.06679*, 2022.

[DFW<sup>+</sup>20] Emily Dinan, Angela Fan, Ledell Wu, Jason Weston, Douwe Kiela, and Adina Williams. Multi-dimensional gender bias classification. In *Proceedings of the 2020 Conference on Empirical Methods in Natural Language Processing (EMNLP)*, pages 314–331, Online, November 2020. Association for Computational Linguistics.

[DKA<sup>+</sup>] Fahim Dalvi, Abdul Rafae Khan, Firoj Alam, Nadir Durrani, Jia Xu, and Hassan Sajjad. Discovering latent concepts learned in bert. In *International Conference on Learning Representations*.

[DLS<sup>+</sup>18] Lucas Dixon, John Li, Jeffrey Sorensen, Nithum Thain, and Lucy Vasserman. Measuring and mitigating unintended bias in text classification. 2018.

[DP19] Sunipa Dev and Jeff Phillips. Attenuating bias in word vectors. In *The 22nd International Conference on Artificial Intelligence and Statistics*, pages 879–887. PMLR, 2019.

[FCS<sup>+</sup>13] Andrea Frome, Greg S Corrado, Jon Shlens, Samy Bengio, Jeff Dean, Marc’Aurelio Ranzato, and Tomas Mikolov. Devise: A deep visual-semantic embedding model. *Advances in neural information processing systems*, 26, 2013.

[FXR13] Chen Fang, Ye Xu, and Daniel N Rockmore. Unbiased metric learning: On the utilization of multiple datasets and web images for softening bias. In *Proceedings of the IEEE International Conference on Computer Vision*, pages 1657–1664, 2013.

[GKG<sup>+</sup>22] Sachin Goyal, Ananya Kumar, Sankalp Garg, Zico Kolter, and Aditi Raghunathan. Finetune like you pretrain: Improved finetuning of zero-shot vision models. *arXiv preprint arXiv:2212.00638*, 2022.

[JYX<sup>+</sup>21] Chao Jia, Yinfei Yang, Ye Xia, Yi-Ting Chen, Zarana Parekh, Hieu Pham, Quoc Le, Yun-Hsuan Sung, Zhen Li, and Tom Duerig. Scaling up visual and vision-language representation learning with noisy text supervision. In *International Conference on Machine Learning*, pages 4904–4916. PMLR, 2021.

[KCJ<sup>+</sup>21] David Krueger, Ethan Caballero, Joern-Henrik Jacobsen, Amy Zhang, Jonathan Binas, Dinghuai Zhang, Remi Le Priol, and Aaron Courville. Out-of-distribution generalization via risk extrapolation (rex). In *International Conference on Machine Learning*, pages 5815–5826. PMLR, 2021.

[KIW22] Polina Kirichenko, Pavel Izmailov, and Andrew Gordon Wilson. Last layer re-training is sufficient for robustness to spurious correlations. *arXiv preprint arXiv:2204.02937*, 2022.

[KNST23] Emre Kıcıman, Robert Ness, Amit Sharma, and Chenhao Tan. Causal reasoning and large language models: Opening a new frontier for causality. *arXiv preprint arXiv:2305.00050*, 2023.

[KSM<sup>+</sup>21] Pang Wei Koh, Shiori Sagawa, Henrik Marklund, Sang Michael Xie, Marvin Zhang, Akshay Balsubramani, Weihua Hu, Michihiro Yasunaga, Richard Lanus Phillips, Irena Gao, et al. Wilds: A benchmark of in-the-wild distribution shifts. In *International Conference on Machine Learning*, pages 5637–5664. PMLR, 2021.

[LCLBC20] Yannick Le Cacheux, Hervé Le Borgne, and Michel Crucianu. Using sentences as semantic representations in large scale zero-shot learning. In *Computer Vision–ECCV 2020 Workshops: Glasgow, UK, August 23–28, 2020, Proceedings, Part I 16*, pages 641–645. Springer, 2020.

[LCT<sup>+</sup>22] Yoonho Lee, Annie S Chen, Fahim Tajwar, Ananya Kumar, Huaxiu Yao, Percy Liang, and Chelsea Finn. Surgical fine-tuning improves adaptation to distribution shifts. *arXiv preprint arXiv:2210.11466*, 2022.

[LGPV20] Anne Lauscher, Goran Glavaš, Simone Paolo Ponzetto, and Ivan Vulić. A general framework for implicit and explicit debiasing of distributional word vector spaces. In *Proceedings of the AAAI Conference on Artificial Intelligence*, volume 34, pages 8131–8138, 2020.

[LHC<sup>+</sup>21] Evan Z Liu, Behzad Haghighi, Annie S Chen, Aditi Raghunathan, Pang Wei Koh, Shiori Sagawa, Percy Liang, and Chelsea Finn. Just train twice: Improving group robustness without training group information. In Marina Meila and Tong Zhang, editors, *Proceedings of the 38th International Conference on Machine Learning*, volume 139 of *Proceedings of Machine Learning Research*, pages 6781–6792. PMLR, 18–24 Jul 2021.

[LLWT15] Ziwei Liu, Ping Luo, Xiaogang Wang, and Xiaoou Tang. Deep learning face attributes in the wild. In *Proceedings of the IEEE international conference on computer vision*, pages 3730–3738, 2015.

[LYSH17] Da Li, Yongxin Yang, Yi-Zhe Song, and Timothy M Hospedales. Deeper, broader and artier domain generalization. In *Proceedings of the IEEE international conference on computer vision*, pages 5542–5550, 2017.

[MFB<sup>+</sup>17] Alexander Miller, Will Feng, Dhruv Batra, Antoine Bordes, Adam Fisch, Jiasen Lu, Devi Parikh, and Jason Weston. ParlAI: A dialog research software platform. In *Proceedings of the 2017 Conference on Empirical Methods in Natural Language Processing: System Demonstrations*, pages 79–84, Copenhagen, Denmark, September 2017. Association for Computational Linguistics.

[MSY<sup>+</sup>21] Binny Mathew, Punyajoy Saha, Seid Muhie Yimam, Chris Biemann, Pawan Goyal, and Animesh Mukherjee. Hatexplain: A benchmark dataset for explainable hate speech detection. In *Proceedings of the AAAI Conference on Artificial Intelligence*, volume 35, pages 14867–14875, 2021.

[NLM19] Jianmo Ni, Jiacheng Li, and Julian McAuley. Justifying recommendations using distantly-labeled reviews and fine-grained aspects. In *Proceedings of the 2019 conference on empirical methods in natural language processing and the 9th international joint conference on natural language processing (EMNLP-IJCNLP)*, pages 188–197, 2019.

[NXP<sup>+</sup>22] Arvind Neelakantan, Tao Xu, Raul Puri, Alec Radford, Jesse Michael Han, Jerry Tworek, Qiming Yuan, Nikolas Tezak, Jong Wook Kim, Chris Hallacy, et al. Text and code embeddings by contrastive pre-training. *arXiv preprint arXiv:2201.10005*, 2022.

[OWJ<sup>+</sup>22] Long Ouyang, Jeffrey Wu, Xu Jiang, Diogo Almeida, Carroll Wainwright, Pamela Mishkin, Chong Zhang, Sandhini Agarwal, Katarina Slama, Alex Ray, et al. Training language models to follow instructions with human feedback. *Advances in Neural Information Processing Systems*, 35:27730–27744, 2022.

[PDN<sup>+</sup>22] Suzanne Petryk, Lisa Dunlap, Keyan Nasseri, Joseph Gonzalez, Trevor Darrell, and Anna Rohrbach. On guiding visual attention with language specification. In *Proceedings of the IEEE/CVF Conference on Computer Vision and Pattern Recognition*, pages 18092–18102, 2022.

[RG19] Nils Reimers and Iryna Gurevych. Sentence-bert: Sentence embeddings using siamese bert-networks. *arXiv preprint arXiv:1908.10084*, 2019.

[RKH<sup>+</sup>21] Alec Radford, Jong Wook Kim, Chris Hallacy, Aditya Ramesh, Gabriel Goh, Sandhini Agarwal, Girish Sastry, Amanda Askell, Pamela Mishkin, Jack Clark, et al. Learning transferable visual models from natural language supervision. In *International conference on machine learning*, pages 8748–8763. PMLR, 2021.

[RWC<sup>+</sup>19] Alec Radford, Jeffrey Wu, Rewon Child, David Luan, Dario Amodei, Ilya Sutskever, et al. Language models are unsupervised multitask learners. *OpenAI blog*, 1(8):9, 2019.

[SKHL19] Shiori Sagawa, Pang Wei Koh, Tatsunori B Hashimoto, and Percy Liang. Distributionally robust neural networks for group shifts: On the importance of regularization for worst-case generalization. *arXiv preprint arXiv:1911.08731*, 2019.

[TE11] Antonio Torralba and Alexei A. Efros. Unbiased look at dataset bias. In *CVPR 2011*, pages 1521–1528, 2011.

[TLI<sup>+</sup>23] Hugo Touvron, Thibaut Lavril, Gautier Izacard, Xavier Martinet, Marie-Anne Lachaux, Timothée Lacroix, Baptiste Rozière, Naman Goyal, Eric Hambro, Faisal Azhar, et al. Llama: Open and efficient foundation language models. *arXiv preprint arXiv:2302.13971*, 2023.

[WLW21] Jialu Wang, Yang Liu, and Xin Eric Wang. Are gender-neutral queries really gender-neutral? mitigating gender bias in image search. *arXiv preprint arXiv:2109.05433*, 2021.

[WPL<sup>+</sup>17] Xiaosong Wang, Yifan Peng, Le Lu, Zhiyong Lu, Mohammadhadi Bagheri, and Ronald M Summers. Chestx-ray8: Hospital-scale chest x-ray database and benchmarks on weakly-supervised classification and localization of common thorax diseases. In *Proceedings of the IEEE conference on computer vision and pattern recognition*, pages 2097–2106, 2017.

[WZS22] Junyang Wang, Yi Zhang, and Jitao Sang. Fairclip: Social bias elimination based on attribute prototype learning and representation neutralization. *arXiv preprint arXiv:2210.14562*, 2022.

[YNPM23] Yu Yang, Besmira Nushi, Hamid Palangi, and Baharan Mirzasoleiman. Mitigating spurious correlations in multi-modal models during fine-tuning. *arXiv preprint arXiv:2304.03916*, 2023.

[ZR22] Michael Zhang and Christopher Ré. Contrastive adapters for foundation model group robustness. *arXiv preprint arXiv:2207.07180*, 2022.

[ZXU<sup>+</sup>23] Sheng Zhang, Yanbo Xu, Naoto Usuyama, Jaspreet Bagga, Robert Tinn, Sam Preston, Rajesh Rao, Mu Wei, Naveen Valluri, Cliff Wong, Matthew Lungren, Tristan Naumann, and Hoifung Poon. Large-scale domain-specific pretraining for biomedical vision-language processing, 2023.

## 426 A Theory details

### 427 A.1 Harmful concept removal

#### 428 A.1.1 Proof of Theorem 4.1

429 We provide the proof of Theorem 4.1. Recall our noise model:

$$\begin{aligned}
 x &= \sum_{s=1}^S \alpha_s z_s + \sum_{r=S+1}^{S+R} \alpha_r z_r + \sum_{b=S+R+1}^{S+R+B} \alpha_b z_b \\
 v_t &= \sum_{s=1}^S \gamma_{s,t} z_s + \sum_{r=S+1}^{S+R} \gamma_{r,t} z_r + \sum_{b=S+R+1}^{S+R+B} \gamma_{b,t} z_b \quad (1 \leq t \leq S)
 \end{aligned}$$

431 . Again, we assume that benign coefficients are drawn from a zero-centered Gaussian distribution,  
 432 i.e.  $\alpha_b, \gamma_{b,t} \sim \mathcal{N}(0, \sigma_{benign})$  and also helpful coefficients and non-target harmful coefficients are  
 433 assumed to be drawn from a Gaussian distribution, i.e.  $\gamma_{q,t} \sim \mathcal{N}(0, \sigma_{insight})$ , where  $1 \leq q \leq R$ ,  
 434  $q \neq t$  so that only  $\gamma_{t,t}$  is a constant. Now we prove the following Theorem.

435 **Theorem 4.1.** *Under the noise model described above, the post-removal coefficient for harmful*  
 436 *concept  $s$  satisfies*

$$|\mathbb{E}[A_s]| \leq \left| \frac{(k-1)\alpha_s \sigma_{insight}^2}{\gamma_{s,s}^2} \right| + \left| \sum_{t \neq s}^S \frac{\alpha_s \sigma_{insight}^2}{\gamma_{t,t}^2} \right|,$$

437 where  $k$  is the number of concepts.

438 *Proof.* Let  $\hat{x}$  be the output of harmful concept removal procedure such that

$$\begin{aligned}
 \hat{x} &= x - \sum_{s=1}^S \frac{x^T v_s}{\|v_s\|^2} v_s \\
 &= \sum_{i=1}^k \alpha_i z_i - \sum_{s=1}^S \frac{\sum_{i=1}^k \alpha_i \gamma_{i,s}}{\sum_{l=1}^k \gamma_{l,s}^2} \left( \sum_{j=1}^k \gamma_{j,s} z_j \right)
 \end{aligned}$$

439 As the first step, we sort out the coefficients of features. For notational convenience, let  $T_s =$   
 440  $\sum_{l=1}^k \gamma_{l,s}^2$ . Then,

$$\begin{aligned}
 \hat{x} &= \sum_{i=1}^k \alpha_i z_i - \sum_{s=1}^S \frac{\sum_{i=1}^k \alpha_i \gamma_{i,s}}{T_s} \left( \sum_{j=1}^k \gamma_{j,s} z_j \right) \\
 &= \sum_{i=1}^k \alpha_i z_i - \sum_{s=1}^S \sum_{i=1}^k \sum_{j=1}^k \frac{\alpha_i \gamma_{i,s} \gamma_{j,s}}{T_s} z_j \\
 &= \sum_{j=1}^k \alpha_j z_j - \sum_{j=1}^k \sum_{s=1}^S \sum_{i=1}^k \frac{\alpha_i \gamma_{i,s} \gamma_{j,s}}{T_s} z_j \\
 &= \sum_{j=1}^k \left( \alpha_j - \sum_{s=1}^S \sum_{i=1}^k \frac{\alpha_i \gamma_{i,s} \gamma_{j,s}}{T_s} \right) z_j
 \end{aligned}$$

441 Thus we can get the expression for the coefficient of the target feature  $z_s$  ( $1 \leq s \leq S$ ),

$$A_s = \alpha_s - \sum_{t=1}^S \sum_{i=1}^k \frac{\alpha_i \gamma_{i,t} \gamma_{s,t}}{T_t}$$

442 Next, we get the bound of the absolute expectation  $|\mathbb{E}[A_s]|$ .

$$\begin{aligned} |\mathbb{E}[A_s]| &= \left| \mathbb{E} \left[ \alpha_s - \sum_{t=1}^S \sum_{i=1}^k \frac{\alpha_i \gamma_{i,t} \gamma_{s,t}}{\sum_{l=1}^k \gamma_{l,t}^2} \right] \right| \\ &\leq \left| \mathbb{E} \left[ \alpha_s - \sum_{t=1}^S \frac{\alpha_s \gamma_{s,t}^2}{\sum_{l=1}^k \gamma_{l,t}^2} \right] \right| + \left| \sum_{t=1}^S \mathbb{E} \left[ \frac{\sum_{i=1, i \neq s}^k \alpha_i \gamma_{i,t} \gamma_{s,t}}{\sum_{l=1}^k \gamma_{l,t}^2} \right] \right| \end{aligned}$$

443 Here, the second term on RHS is 0 by independence, i.e.

$$\begin{aligned} \left| \mathbb{E} \left[ \frac{\sum_{i=1, i \neq s}^k \alpha_i \gamma_{i,t} \gamma_{s,t}}{\sum_{l=1}^k \gamma_{l,t}^2} \right] \right| &\leq \left| \mathbb{E} \left[ \frac{\sum_{i=1, i \neq s}^k \alpha_i \gamma_{i,t} \gamma_{s,t}}{\gamma_{t,t}^2} \right] \right| \\ &= \left| \sum_{i=1, i \neq s}^k \frac{\alpha_i}{\gamma_{t,t}^2} \mathbb{E}[\gamma_{i,t} \gamma_{s,t}] \right| = 0 \end{aligned}$$

444 since  $\mathbb{E}[\gamma_{s,t} \gamma_{j,t}] = 0$  by independence. Now we split the first term and get the bounds separately.

$$\begin{aligned} |\mathbb{E}[A_s]| &\leq \left| \mathbb{E} \left[ \alpha_s - \sum_{t=1}^S \frac{\alpha_s \gamma_{s,t}^2}{\sum_{l=1}^k \gamma_{l,t}^2} \right] \right| \\ &\leq \left| \mathbb{E} \left[ \alpha_s - \frac{\alpha_s \gamma_{s,s}^2}{\sum_{l=1}^s \gamma_{l,s}^2} \right] \right| + \left| \sum_{t=1, t \neq s}^S \mathbb{E} \left[ \frac{\alpha_s \gamma_{s,t}^2}{\sum_{l=1}^k \gamma_{l,t}^2} \right] \right| \end{aligned}$$

445 The upper bound for the first term can be obtained by

$$\begin{aligned} \left| \mathbb{E} \left[ \alpha_s - \frac{\alpha_s \gamma_{s,s}^2}{\sum_{l=1}^s \gamma_{l,s}^2} \right] \right| &= \left| \mathbb{E} \left[ - \frac{\sum_{i \neq s}^k \alpha_s \gamma_{i,s}^2}{\sum_{l=1}^s \gamma_{l,s}^2} \right] \right| \\ &\leq \left| \mathbb{E} \left[ \frac{\sum_{i \neq s}^k \alpha_s \gamma_{i,s}^2}{\gamma_{s,s}^2} \right] \right| \\ &\leq \left| \frac{\alpha_s}{\gamma_{s,s}^2} \sum_{i \neq s}^k \mathbb{E}[\gamma_{i,s}^2] \right| \\ &\leq \left| \frac{(k-1) \alpha_s \sigma_{insight}^2}{\gamma_{s,s}^2} \right| \end{aligned}$$

446 . And, for the second term,

$$\begin{aligned} \left| \sum_{t=1, t \neq s}^S \mathbb{E} \left[ \frac{\alpha_s \gamma_{s,t}^2}{\sum_{i=1}^k \gamma_{i,t}^2} \right] \right| &\leq \left| \sum_{t=1, t \neq s}^S \mathbb{E} \left[ \frac{\alpha_s \gamma_{s,t}^2}{\gamma_{t,t}^2} \right] \right| \\ &= \left| \sum_{t=1, t \neq s}^S \frac{\alpha_s}{\gamma_{t,t}^2} \mathbb{E}[\gamma_{s,t}^2] \right| \end{aligned}$$

447 Combining two bounds, we get the proposed result.

$$|\mathbb{E}[A_s]| \leq \left| \frac{(k-1) \alpha_s \sigma_{insight}^2}{\gamma_{s,s}^2} \right| + \left| \sum_{t \neq s}^S \frac{\alpha_s \sigma_{insight}^2}{\gamma_{t,t}^2} \right|,$$

448

□

While the constant  $(k - 1)$  can look daunting since it actually increases as the number of concepts increases, a bound less affected by  $\sigma_{insight}^2$  exists as well, scaling down the target coefficient  $\alpha_s$ .

**Corollary A.0.1.** *Under the noise model of Theorem 4.1, the post-removal coefficient for harmful concept  $s$  satisfies*

$$|\mathbb{E}[A_s]| \leq \left| \alpha_s \frac{(k-1)\sigma_{insight}^2}{\gamma_{s,s}^2 + (k-1)\sigma_{insight}^2} \right| + \left| \sum_{t \neq s}^S \frac{\alpha_s \sigma_{insight}^2}{\gamma_{t,t}^2} \right|,$$

where  $k$  is the number of concepts.

*Proof.* With the identical steps to the proof of Theorem 4.1, we can obtain

$$\begin{aligned} |\mathbb{E}[A_s]| &\leq \left| \mathbb{E} \left[ \alpha_s - \sum_{t=1}^S \frac{\alpha_s \gamma_{s,t}^2}{\sum_{l=1}^k \gamma_{l,t}^2} \right] \right| \\ &\leq \left| \mathbb{E} \left[ \alpha_s - \frac{\alpha_s \gamma_{s,s}^2}{\sum_{l=1}^k \gamma_{l,s}^2} \right] \right| + \left| \sum_{t=1, t \neq s}^S \mathbb{E} \left[ \frac{\alpha_s \gamma_{s,t}^2}{\sum_{l=1}^k \gamma_{l,t}^2} \right] \right| \\ &\leq \left| \mathbb{E} \left[ \alpha_s - \frac{\alpha_s \gamma_{s,s}^2}{\sum_{l=1}^k \gamma_{l,s}^2} \right] \right| + \left| \sum_{t=1, t \neq s}^S \frac{\alpha_s}{\gamma_{t,t}^2} \mathbb{E}[\gamma_{s,t}^2] \right| \end{aligned}$$

We improve the first term as follows.

$$\begin{aligned} \left| \mathbb{E} \left[ \alpha_s - \frac{\alpha_s \gamma_{s,s}^2}{\sum_{l=1}^s \gamma_{l,s}^2} \right] \right| &= \left| \alpha_s - \alpha_s \mathbb{E} \left[ \frac{\gamma_{s,s}^2}{\sum_{l=1}^s \gamma_{l,s}^2} \right] \right| \\ &\leq \left| \alpha_s - \alpha_s \frac{\gamma_{s,s}^2}{\mathbb{E} \left[ \sum_{l=1}^s \gamma_{l,s}^2 \right]} \right| \quad \because \text{Jensen's inequality} \\ &= \left| \alpha_s \left( 1 - \frac{\gamma_{s,s}^2}{\mathbb{E} \left[ \sum_{l=1}^s \gamma_{l,s}^2 \right]} \right) \right| \\ &= \left| \alpha_s \left( 1 - \frac{\gamma_{s,s}^2}{\gamma_{s,s}^2 + (k-1)\sigma_{insight}^2} \right) \right| \\ &= \left| \alpha_s \left( \frac{(k-1)\sigma_{insight}^2}{\gamma_{s,s}^2 + (k-1)\sigma_{insight}^2} \right) \right| \end{aligned}$$

□

### A.1.2 Effects on helpful, benign coefficients

Based on the coefficient expression

$$A_q = \alpha_q - \sum_{t=1}^S \sum_{i=1}^k \frac{\alpha_i \gamma_{i,t} \gamma_{q,t}}{\sum_{l=1}^k \gamma_{l,t}^2}$$

, we analyze the bound of  $|\mathbb{E}[A_q]|$  for  $S+1 \leq q \leq k$ . Basically, the following theorem implies helpful, benign coefficients are less affected than harmful coefficients as long as the harmful coefficients of insight embeddings are significant and the noise is small.

**Theorem A.1.** *Under the same noise model described above, the post-removal coefficient for helpful or benign concept  $q$  satisfies*

$$|\mathbb{E}[A_q] - \alpha_q| \leq \left| \sum_{t=1}^S \frac{\alpha_q \sigma_{insight}^2}{\gamma_{t,t}^2} \right|.$$

464 *Proof.* The proof technique is essentially identical to Theorem 4.1.

$$\begin{aligned}
|\mathbb{E}[A_q] - \alpha_q| &= \left| \alpha_q - \mathbb{E} \left[ \alpha_q - \sum_{t=1}^S \frac{\alpha_q \gamma_{q,t}^2 + \sum_{j=1, j \neq q} \alpha_q \gamma_{q,t} \gamma_{j,t}}{\sum_{l=1}^k \gamma_{l,t}^2} \right] \right| \\
&\leq \left| \mathbb{E} \left[ \sum_{t=1}^S \frac{\alpha_q \gamma_{q,t}^2}{\sum_{l=1}^k \gamma_{l,t}^2} \right] \right| + \left| \mathbb{E} \left[ \frac{\sum_{j=1, j \neq q} \alpha_q \gamma_{q,t} \gamma_{j,t}}{\sum_{l=1}^k \gamma_{l,t}^2} \right] \right| \\
&= \left| \mathbb{E} \left[ \sum_{t=1}^S \frac{\alpha_q \gamma_{q,t}^2}{\sum_{l=1}^k \gamma_{l,t}^2} \right] \right| \quad \because \left| \mathbb{E} \left[ \frac{\sum_{j=1, j \neq q} \alpha_q \gamma_{q,t} \gamma_{j,t}}{\sum_{l=1}^k \gamma_{l,t}^2} \right] \right| = 0 \\
&\leq \left| \sum_{t=1}^S \frac{\alpha_q}{\gamma_{t,t}^2} \mathbb{E}[\gamma_{q,t}^2] \right| \\
&= \left| \sum_{t=1}^S \frac{\alpha_q \sigma_{insight}^2}{\gamma_{t,t}^2} \right|
\end{aligned}$$

465

□

466 This bound implies the differences of helpful or benign features by harmful concept removal are  
467 proportional to the noise of insight embeddings  $\sigma_{insight}^2$ , and inversely proportional to the coefficients  
468 of harmful coefficients of insight embeddings.

## 469 A.2 Helpful concept addition

470 With a similar fashion to the harmful concept removal, we consider the following noise model for the  
471 helpful concept addition.

$$\begin{aligned}
x &= \sum_{s=1}^S \alpha_s z_s + \sum_{r=S+1}^{S+R} \alpha_r z_r + \sum_{b=S+R+1}^{S+R+B} \alpha_b z_b \\
v_t &= \sum_{s=1}^S \gamma_{s,t} z_s + \sum_{r=S+1}^{S+R} \gamma_{r,t} z_r + \sum_{b=S+R+1}^{S+R+B} \gamma_{b,t} z_b \quad (S+1 \leq t \leq S+R)
\end{aligned}$$

472  
473 . Again, we assume that benign coefficients are drawn from a zero-centered Gaussian distribution,  
474 i.e.  $\alpha_b, \gamma_{b,t} \sim \mathcal{N}(0, \sigma_{benign})$  and also harmful coefficients and non-target helpful coefficients  
475 are assumed to be drawn from another Gaussian distribution, i.e.  $\gamma_{q,t} \sim \mathcal{N}(0, \sigma_{insight})$ , where  
476  $1 \leq q \leq S+R$ ,  $q \neq s$  so that only  $\gamma_{t,t}$  are constants.

### 477 A.2.1 Lower bound for the coefficient of helpful concept

478 To show the lower bound for the coefficient of helpful concepts, we need additional mild assumptions.  
479 For  $S+1 \leq r \leq S+R$

- 480 1.  $\alpha_r > 0$
- 481 2.  $\gamma_{r,r}^2 \geq \sigma_{insight}^2$

482 The first assumption can be interpreted that the input embedding is already somewhat aligned with  
483 the label embeddings' concepts — since typically pretrained models provide embeddings aligned  
484 with class text, it can be justified. The second assumption is also a natural assumption: the signal is  
485 stronger than noise. Now we state Theorem and show the proof of the theorem.

486 **Theorem A.2.** Assuming  $\alpha_r \geq 0, \gamma_{r,r}^2 \geq \sigma_{insight}^2$  for  $S+1 \leq r \leq S+R$  under the described noise  
487 model, the post-addition coefficient for helpful concept  $r$  satisfies

$$\mathbb{E}[A_r] \geq \left( 1 + \frac{\gamma_{r,r}^2}{\gamma_{r,r}^2 + (k-1)\sigma_{insight}^2} \right) \alpha_r$$



488 *Proof.* Let  $\hat{x}$  be the output of helpful concept addition procedure such that

$$\begin{aligned}\hat{x} &= x + \sum_{t=S+1}^{S+R} \frac{x^T v_s}{\|v_s\|^2} v_s \\ &= \sum_{i=1}^k \alpha_i z_i + \sum_{t=S+1}^{S+R} \frac{\sum_{i=1}^k \alpha_i \gamma_{i,t}}{\sum_{l=1}^k \gamma_{l,t}^2} \left( \sum_{j=1}^k \gamma_{j,t} z_j \right)\end{aligned}$$

489 As the first step, we sort out the coefficients of concepts. For notational convenience, let  $T_t =$   
490  $\sum_{l=1}^k \gamma_{l,t}^2$ . Then,

$$\begin{aligned}\hat{x} &= \sum_{i=1}^k \alpha_i z_i + \sum_{t=S+1}^{S+R} \frac{\sum_{i=1}^k \alpha_i \gamma_{i,t}}{T_t} \left( \sum_{j=1}^k \gamma_{j,t} z_j \right) \\ &= \sum_{i=1}^k \alpha_i z_i + \sum_{t=S+1}^{S+R} \sum_{i=1}^k \sum_{j=1}^k \frac{\alpha_i \gamma_{i,t} \gamma_{j,t}}{T_t} z_j \\ &= \sum_{j=1}^k \alpha_j z_j + \sum_{j=1}^k \sum_{t=S+1}^{S+R} \sum_{i=1}^k \frac{\alpha_i \gamma_{i,t} \gamma_{j,t}}{T_t} z_j \\ &= \sum_{j=1}^k \left( \alpha_j + \sum_{t=S+1}^{S+R} \sum_{i=1}^k \frac{\alpha_i \gamma_{i,t} \gamma_{j,t}}{T_t} \right) z_j\end{aligned}$$

491 Thus we can get the expression for the coefficient of the target concept  $z_r$  ( $S+1 \leq r \leq S+R$ ),

$$A_r = \alpha_r + \sum_{t=S+1}^{S+R} \sum_{i=1}^k \frac{\alpha_i \gamma_{i,t} \gamma_{r,t}}{T_t}$$

492 Then,

$$\begin{aligned}\mathbb{E}[A_r] &= \mathbb{E} \left[ \alpha_r + \sum_{t=S+1}^{S+R} \sum_{i=1}^k \frac{\alpha_i \gamma_{i,t} \gamma_{r,t}}{T_t} \right] \\ &= \alpha_r + \mathbb{E} \left[ \frac{\alpha_r \gamma_{r,r}^2}{\sum_{l=1}^k \gamma_{l,r}^2} \right] + \mathbb{E} \left[ \sum_{t=S+1, t \neq r}^{S+R} \frac{\alpha_t \gamma_{r,t}^2}{\sum_{l=1}^k \gamma_{l,r}^2} \right] + \mathbb{E} \left[ \sum_{t=S+1}^{S+R} \frac{\sum_{i=1, i \neq r}^k \alpha_i \gamma_{i,t} \gamma_{r,t}}{\sum_{l=1}^k \gamma_{l,r}^2} \right] \\ &\geq \alpha_r + \mathbb{E} \left[ \frac{\alpha_r \gamma_{r,r}^2}{\sum_{l=1}^k \gamma_{l,r}^2} \right] + \mathbb{E} \left[ \sum_{t=S+1}^{S+R} \frac{\alpha_i \gamma_{i,t} \gamma_{r,t}}{\sum_{l=1}^k \gamma_{l,r}^2} \right] \\ &\geq \alpha_r + \mathbb{E} \left[ \frac{\alpha_r \gamma_{r,r}^2}{\sum_{l=1}^k \gamma_{l,r}^2} \right] + \mathbb{E} \left[ \sum_{t=S+1}^{S+R} \frac{\alpha_i \gamma_{i,t} \gamma_{r,t}}{k \gamma_{r,r}^2} \right]\end{aligned}$$

493 Here, the third term can be dropped since  $\gamma_{i,t}$  and  $\gamma_{r,t}$  are independent. Thus,

$$\begin{aligned}
\mathbb{E}[A_r] &\geq \alpha_r + \mathbb{E} \left[ \frac{\alpha_r \gamma_{r,r}^2}{\sum_{l=1}^k \gamma_{l,r}^2} \right] \\
&\geq \alpha_r + \alpha_r \gamma_{r,r}^2 \mathbb{E} \left[ \frac{1}{\sum_{l=1}^k \gamma_{l,r}^2} \right] \\
&\geq \alpha_r + \alpha_r \gamma_{r,r}^2 \frac{1}{\mathbb{E} \left[ \sum_{l=1}^k \gamma_{l,r}^2 \right]} \\
&= \alpha_r + \alpha_r \gamma_{r,r}^2 \frac{1}{\gamma_{r,r}^2 + (k-1)\sigma_{insight}^2}
\end{aligned}$$

494 Finally, we obtain the result.

$$\mathbb{E}[A_r] \geq \left( 1 + \frac{\gamma_{r,r}^2}{\gamma_{r,r}^2 + (k-1)\sigma_{insight}^2} \right) \alpha_r$$

495

□

496 Note that the nonnegative condition can be dropped by keeping  $\mathbb{E} \left[ \frac{\alpha_t \gamma_{r,t}^2}{\sum_{l=1}^k \gamma_{l,t}^2} \right]$  where  $\alpha_t < 0$  terms,  
 497 which linearly loosens the lower bound.

### 498 A.3 Effects on harmful, benign coefficients

499 For the notational convenience, let  $I_{helpful}^c$  be the non-helpful concept index set such that  $I_{helpful}^c =$   
 500  $\{i \in \mathbb{N} | i \leq S \text{ or } S+R+1 \leq i \leq S+R+B\}$ . For  $q \in I_R^c$ , we obtain the bound of effects on  
 501 harmful, benign coefficients with a similar fashion to the harmful concept removal case.

502 **Theorem A.3.** *Under the same noise model described above, the post-addition coefficient for helpful*  
 503 *or benign concept  $q$  satisfies*

$$|\mathbb{E}[A_q] - \alpha_q| \leq \left| \sum_{t=S+1}^{S+R} \frac{\alpha_q \sigma_{insight}^2}{\gamma_{t,t}^2} \right|.$$

*Proof.*

$$\begin{aligned}
|\mathbb{E}[A_q] - \alpha_q| &= \left| \alpha_q - \mathbb{E} \left[ \alpha_q + \sum_{t=1}^S \frac{\alpha_q \gamma_{q,t}^2 + \sum_{j=1, j \neq q} \alpha_q \gamma_{q,t} \gamma_{j,t}}{\sum_{l=1}^k \gamma_{l,t}^2} \right] \right| \\
&\leq \left| \mathbb{E} \left[ \sum_{t=S+1}^{S+R} \frac{\alpha_q \gamma_{q,t}^2}{\sum_{l=1}^k \gamma_{l,t}^2} \right] \right| + \left| \mathbb{E} \left[ \frac{\sum_{j=1, j \neq q} \alpha_q \gamma_{q,t} \gamma_{j,t}}{\sum_{l=1}^k \gamma_{l,t}^2} \right] \right| \\
&= \left| \mathbb{E} \left[ \sum_{t=S+1}^{S+R} \frac{\alpha_q \gamma_{q,t}^2}{\sum_{l=1}^k \gamma_{l,t}^2} \right] \right| \quad \because \left| \mathbb{E} \left[ \frac{\sum_{j=1, j \neq q} \alpha_q \gamma_{q,t} \gamma_{j,t}}{\sum_{l=1}^k \gamma_{l,t}^2} \right] \right| = 0 \\
&\leq \left| \sum_{t=S+1}^{S+R} \frac{\alpha_q}{\gamma_{t,t}^2} \mathbb{E}[\gamma_{q,t}^2] \right| \\
&= \left| \sum_{t=S+1}^{S+R} \frac{\alpha_q \sigma_{insight}^2}{\gamma_{t,t}^2} \right|
\end{aligned}$$

504

□

#### 505 A.4 Combined results

506 Now, we are ready to provide the combine result, i.e. the coefficient bounds with harmful concept  
507 removal and helpful concept addition. The noise model can be described as follows.

$$\begin{aligned}
 x &= \sum_{s=1}^S \alpha_s z_s + \sum_{r=S+1}^{S+R} \alpha_r z_r + \sum_{b=S+R+1}^{S+R+B} \alpha_b z_b \\
 v_t &= \sum_{s=1}^S \gamma_{s,t} z_s + \sum_{r=S+1}^{S+R} \gamma_{r,t} z_r + \sum_{b=S+R+1}^{S+R+B} \gamma_{b,t} z_b \quad (1 \leq t \leq S+R) \\
 \alpha_b, \gamma_{b,t} &\sim \mathcal{N}(0, \sigma_{benign}) \\
 \gamma_{q,t} &\sim \mathcal{N}(0, \sigma_{insight})
 \end{aligned}$$

511 , where  $1 \leq q \leq S+R$ ,  $q \neq s$  so that only  $\gamma_{t,t}$  is a constant. We can obtain the expression for each  
512 coefficient as before.

$$\begin{aligned}
 \hat{x} &= \sum_{j=1}^k \left( a_j - \sum_{s=1}^S \sum_{i=1}^k \frac{\alpha_i \gamma_{i,s} \gamma_{j,s}}{T_s} + \sum_{r=S+1}^{S+R} \sum_{i=1}^k \frac{\alpha_i \gamma_{i,r} \gamma_{j,r}}{T_r} \right) z_j \\
 A_q &= a_q - \sum_{s=1}^S \sum_{i=1}^k \frac{\alpha_i \gamma_{i,s} \gamma_{q,s}}{T_s} + \sum_{r=S+1}^{S+R} \sum_{i=1}^k \frac{\alpha_i \gamma_{i,r} \gamma_{q,r}}{T_r}
 \end{aligned}$$

514 , where  $A_q$  is the coefficient of  $z_q$  ( $1 \leq q \leq k$ ) after ROBOSHOT(ignoring normalization) and  
515  $T_t = \sum_{l=1}^k \gamma_{l,t}^2$ . Using the results from the previous subsections, we provide an upper bound on  
516 harmful coefficients, a lower bound on helpful coefficients, and an upper bound on the change in the  
517 benign coefficients.

518 **Theorem A.4.** *Under the combined noise model described above, the post-ROBOSHOT coefficient*  
519 *for harmful concept  $q$  ( $1 \leq q \leq S$ ) satisfies*

$$|\mathbb{E}[A_q]| \leq \left| \frac{(k-1)\alpha_q \sigma_{insight}^2}{\gamma_{q,q}^2} \right| + \left| \sum_{t=1, t \neq q}^{S+R} \frac{\alpha_q \sigma_{insight}^2}{\gamma_{t,t}^2} \right|,$$

520 where  $k$  is the number of concepts.

*Proof.*

$$\begin{aligned}
 |\mathbb{E}[A_q]| &= \left| \mathbb{E} \left[ a_q - \sum_{s=1}^S \sum_{i=1}^k \frac{\alpha_i \gamma_{i,s} \gamma_{q,s}}{T_s} + \sum_{r=S+1}^{S+R} \sum_{i=1}^k \frac{\alpha_i \gamma_{i,r} \gamma_{q,r}}{T_r} \right] \right| \\
 &\leq \left| \frac{(k-1)\alpha_q \sigma_{insight}^2}{\gamma_{q,q}^2} \right| + \left| \sum_{s=1, s \neq q}^S \frac{\alpha_q \sigma_{insight}^2}{\gamma_{s,s}^2} \right| + \left| \sum_{t=S+1}^{S+R} \frac{\alpha_q \sigma_{insight}^2}{\gamma_{t,t}^2} \right| \\
 &= \left| \frac{(k-1)\alpha_q \sigma_{insight}^2}{\gamma_{q,q}^2} \right| + \left| \sum_{t=1, t \neq q}^{S+R} \frac{\alpha_q \sigma_{insight}^2}{\gamma_{t,t}^2} \right| \quad \because \text{two terms have the same sign by } a_q
 \end{aligned}$$

521 □

522 Next, we state the lower bound for the helpful features. Still, we assume the signs of helpful, harmful  
523 concepts in input embeddings for the clarity of theorem.

$$\begin{aligned}
 \alpha_s &\leq 0 \quad (1 \leq s \leq S) \\
 \alpha_r &\geq 0 \quad (S+1 \leq r \leq S+R)
 \end{aligned}$$

525 Also, we assume  $\gamma_{t,t}^2 \geq \sigma_{insight}^2$  ( $1 \leq t \leq S+R$ )

**Theorem A.5.** With additional assumptions  $\alpha_s \leq 0$  ( $1 \leq s \leq S$ ),  $\alpha_r \geq 0$  ( $S+1 \leq r \leq S+R$ ),  $\gamma_{t,t}^2 \geq \sigma_{insight}^2$  under the combined noise model, the post-ROBOSHOT coefficient for helpful concept  $q$  ( $S+1 \leq q \leq S+R$ ) satisfies

$$\mathbb{E}[A_q] \geq \left(1 + \frac{\gamma_{q,q}^2}{\gamma_{q,q}^2 + (k-1)\sigma_{insight}^2}\right) \alpha_q$$

*Proof.*

$$\begin{aligned} \mathbb{E}[A_q] &= \mathbb{E} \left[ a_q - \sum_{s=1}^S \sum_{i=1}^k \frac{\alpha_i \gamma_{i,s} \gamma_{q,s}}{T_s} + \sum_{r=S+1}^{S+R} \sum_{i=1}^k \frac{\alpha_i \gamma_{i,r} \gamma_{q,r}}{T_r} \right] \\ &= \mathbb{E} \left[ a_q + \sum_{r=S+1}^{S+R} \sum_{i=1}^k \frac{\alpha_i \gamma_{i,r} \gamma_{q,r}}{T_r} \right] - \mathbb{E} \left[ \sum_{s=1}^S \sum_{i=1}^k \frac{\alpha_i \gamma_{i,s} \gamma_{q,s}}{T_s} \right] \\ &= \mathbb{E} \left[ a_q + \sum_{r=S+1}^{S+R} \sum_{i=1}^k \frac{\alpha_i \gamma_{i,r} \gamma_{q,r}}{T_r} \right] - \mathbb{E} \left[ \sum_{s=1}^S \frac{\alpha_s \gamma_{q,s}^2}{T_s} \right] - \mathbb{E} \left[ \sum_{s=1}^S \sum_{i=1, i \neq q}^k \frac{\alpha_i \gamma_{i,s} \gamma_{q,s}}{T_s} \right] \end{aligned}$$

Here,  $\mathbb{E} \left[ \sum_{s=1}^S \sum_{i=1, i \neq q}^k \frac{\alpha_i \gamma_{i,s} \gamma_{q,s}}{T_s} \right]$  is zero by independence, and  $-\mathbb{E} \left[ \sum_{s=1}^S \frac{\alpha_s \gamma_{q,s}^2}{T_s} \right] \geq 0$  since  $\alpha_s \leq 0$  by assumption, which can be dropped for a lower bound.

$$\begin{aligned} \mathbb{E}[A_q] &= \mathbb{E} \left[ a_q + \sum_{r=S+1}^{S+R} \sum_{i=1}^k \frac{\alpha_i \gamma_{i,r} \gamma_{q,r}}{T_r} \right] - \mathbb{E} \left[ \sum_{s=1}^S \frac{\alpha_s \gamma_{q,s}^2}{T_s} \right] - \mathbb{E} \left[ \sum_{s=1}^S \sum_{i=1, i \neq q}^k \frac{\alpha_i \gamma_{i,s} \gamma_{q,s}}{T_s} \right] \\ &\geq \mathbb{E} \left[ a_q + \sum_{r=S+1}^{S+R} \sum_{i=1}^k \frac{\alpha_i \gamma_{i,r} \gamma_{q,r}}{T_r} \right] \\ &\geq \left(1 + \frac{\gamma_{q,q}^2}{\gamma_{q,q}^2 + (k-1)\sigma_{insight}^2}\right) \alpha_q \end{aligned}$$

531

□

Now, we state the upper bound on the changes in benign concepts. The proof is straightforward from the previous ones in harmful concept removal and helpful concept addition.

**Corollary A.5.1.** Under the same combined noise model, the post-ROBOSHOT coefficient for benign concept  $q$  satisfies

$$|\mathbb{E}[A_q] - \alpha_q| \leq \left| \sum_{t=1}^{S+R} \frac{\alpha_q \sigma_{insight}^2}{\gamma_{t,t}^2} \right|.$$

## B Experiments details

### B.1 Datasets

Table 5 provides details of the datasets used in our experiments. For Gender Bias dataset [DFW<sup>+</sup>20, MFB<sup>+</sup>17], we test using the train set to get more data. For all other datasets, we use the default test set. For Amazon-WILDS [NLM19] dataset, we convert the original 5-class rating classification into binary, by removing all samples with rating 3, and convert rating 1 and 2 into *bad* label, and 4 and 5 into *good* label.

| Dataset             | Groups                                                                                                                                                                                                                                                                                                                                                        | $N_{all}$ | $N_{wg}$ | $n_{class}$ | classes                                                 |
|---------------------|---------------------------------------------------------------------------------------------------------------------------------------------------------------------------------------------------------------------------------------------------------------------------------------------------------------------------------------------------------------|-----------|----------|-------------|---------------------------------------------------------|
| Waterbirds          | { landbird in land,<br>landbird in water,<br>waterbird on land,<br>waterbird on water }                                                                                                                                                                                                                                                                       | 5794      | 642      | 2           | {landbird,<br>waterbird }                               |
| CelebA              | { male & not blond,<br>female & not blond,<br>male & blond ,<br>female & blond }                                                                                                                                                                                                                                                                              | 19962     | 180      | 2           | {not blond,<br>blond}                                   |
| PACS                | { art, cartoons,<br>photos, sketches, }                                                                                                                                                                                                                                                                                                                       | 9991      | 80       | 7           | {dogs, elephant,<br>giraffe, guitar,<br>house, person } |
| VLCS                | { Caltech101,<br>LabelMe,<br>SUN09,<br>VOC2007 }                                                                                                                                                                                                                                                                                                              | 10725     | 20       | 5           | {bird, car,<br>chair, dog, person }                     |
| CXR14               | { no-pneumothorax,<br>pneumothorax }                                                                                                                                                                                                                                                                                                                          | 2661      | 20       | 2           | {no-pneumothorax,<br>pneumothorax }                     |
| CivilComments-WILDS | { male, female, LGBTQ,<br>christian, muslim,<br>other religions, black, white }                                                                                                                                                                                                                                                                               | 133782    | 520      | 2           | {non-toxic,<br>toxic }                                  |
| HateXplain          | {hindu, islam, minority,<br>refugee, indian, caucasian,<br>hispanic, women, disability,<br>homosexual, arab, christian,<br>jewish, men, african,<br>nonreligious, asian, indigenous,<br>heterosexual, buddhism,<br>bisexual, asexual }                                                                                                                        | 1921      | 6        | 2           | {normal,<br>offensive }                                 |
| Amazon-WILDS        | {beauty, garden, books,<br>luxury beauty, kindle store,<br>movies and TV, pet supplies,<br>industrial and scientific,<br>office products,<br>CDs and vinyl, electronics,<br>cell phones, magazine,<br>clothing, groceries, music,<br>instruments, tools, sports,<br>automotive, toys, arts crafts,<br>kitchen, video games,<br>pantry, software, gift cards } | 90078     | 25       | 2           | {good,bad }                                             |
| Gender Bias         | { male, female }                                                                                                                                                                                                                                                                                                                                              | 22750     | 3594     | 2           | {female, male }                                         |

Table 5: Dataset details

## 543 B.2 Prompt templates

544 We provide details on prompts used to get the  $v^{harmful}$  and  $v^{helpful}$  on image datasets in Table  
545 6. As mentioned in the main body, for NLP datasets we only used  $v^{harmful}$ . Additionally, we use  
546 the demographic mentions annotations to construct  $v^{harmful}$  in CivilComments-WILDS [BDS<sup>+</sup>19,  
547 KSM<sup>+</sup>21] and HateXplain [MSY<sup>+</sup>21]. We provide prompt details to get  $v^{harmful}$  for Amazon-  
548 WILDS [NLM19, KSM<sup>+</sup>21] and Gender Bias [DFW<sup>+</sup>20, MFB<sup>+</sup>17] datasets in Table 7. We also  
549 provide class prompts in Table 8.

| Dataset | Model          | $v^{harmful}$ prompt                                      | $v^{helpful}$ prompt                                                                                                                                                |
|---------|----------------|-----------------------------------------------------------|---------------------------------------------------------------------------------------------------------------------------------------------------------------------|
| All     | ChatGPT        | "List the biased/spurious differences between [classes]." | "List the true visual differences between [classes]."                                                                                                               |
|         | Flan-T5 & GPT2 | {"[class] typically", "[class] usually" }                 | { "a characteristic of [class]: ", "[class] are", "'a [class] is", "Characteristics of [class]"<br>"Stereotype of [class]"<br>"Typical characteristic of [class]" } |
|         | LLaMA          | "List the biased/spurious characteristics of [class]"     | "List the visual characteristics of [class]"                                                                                                                        |

Table 6: Image dataset prompt details

| Dataset      | Model   | $v^{harmful}$ prompt                                                                     |
|--------------|---------|------------------------------------------------------------------------------------------|
| Amazon-WILDS | ChatGPT | "what are the biased differences between good and bad amazon reviews?"                   |
| Gender bias  | ChatGPT | "what are the biased differences between comments about female and comments about male?" |

Table 7: NLP dataset prompt details

| Dataset             | Class prompt                                          |
|---------------------|-------------------------------------------------------|
| Waterbirds          | [ "a landbird", "a waterbird" ]                       |
| CelebA              | [ "person with dark hair", "person with blond hair" ] |
| PACS                | "an image of [class]"                                 |
| VLCS                | "this object is [class]"                              |
| CXR14               | [ "non-pneumothorax", "pneumothorax" ]                |
| CivilComments-WILDS | [ "non-toxic", "toxic" ]                              |
| HateXplain          | [ "normal", "offensive" ]                             |
| Amazon-WILDS        | [ "negative", "positive" ]                            |
| Gender Bias         | [ "female", "male" ]                                  |

Table 8: Class prompt details

### 550 B.3 Model and hyperparameters

551 All experiments are carried out using frozen weights and embeddings from huggingface (ALIGN,  
552 AltCLIP) and open-clip (CLIP ViT-B-32 and ViT-L-14, BiomedCLIP), and no training is involved.  
553 There is no randomness in the experiment results reported in the main body of the paper.
